# Supplementary material for: DNA photonuclease activity of four new copper(ii) complexes under UV and red light: theoretical/experimental correlations with active species generation
Source: Royal Society of Chemistry journal article supplement (doi:10.1039/b920122j), 2009-12-23
Supplement: b920122j.pdf [file b920122j.pdf]

## SUPPLEMENTARY INFORMATION

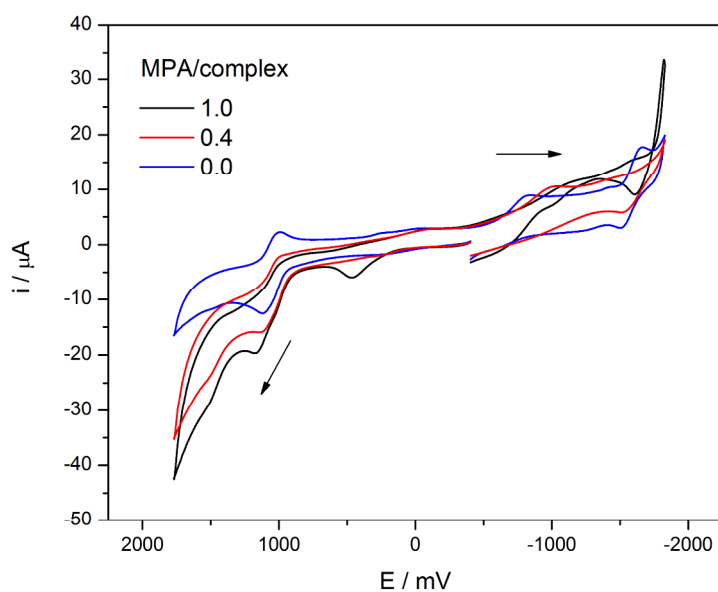

Figure S1. Electrochemical changes during addition of MPA to solution of the complex **2** in  $\text{CH}_3\text{CN}$ .  $[\text{complex}] = 1 \times 10^{-4} \text{ mol L}^{-1}$ .

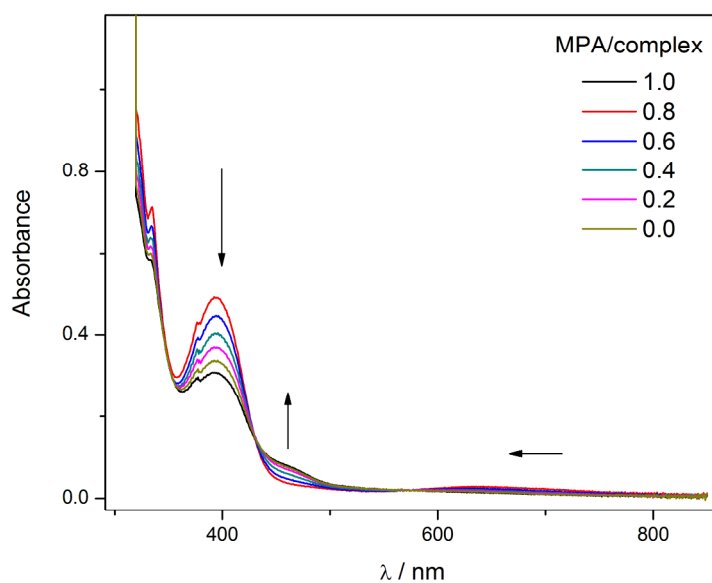

Figure S2. Spectral changes during addition of MPA to solution of the complex **2** in  $\text{CH}_3\text{CN}$ .  $[\text{complex}] = 1 \times 10^{-4} \text{ mol L}^{-1}$ . After the composition 1 : 1, no other change is observed with additional MPA.

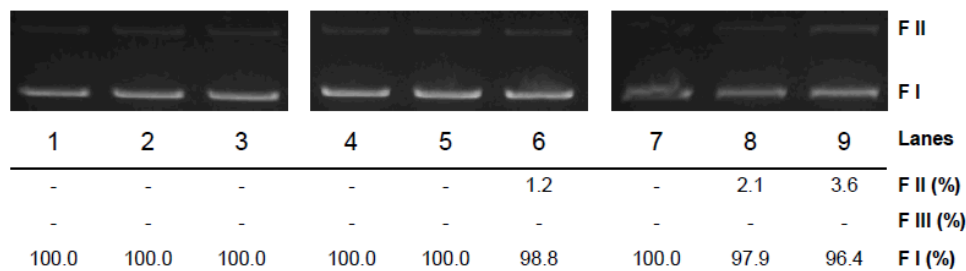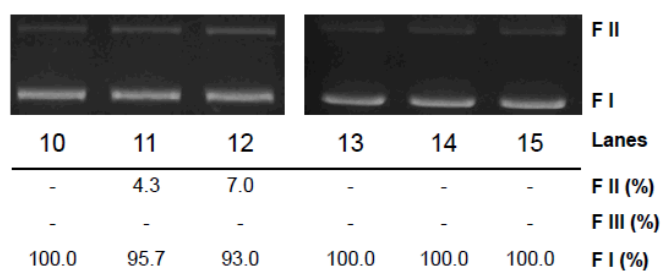

Figure S3. DNA cleavage of complexes **1-5** in dark for 15 min at 37°C. Lane 1: DNA control; lane 2: DNA + **2** (6.25  $\mu\text{mol L}^{-1}$ ); lane 3: DNA + **2** (12.50  $\mu\text{mol L}^{-1}$ ); lane 4: DNA control; lane 5: DNA + **3** (6.25  $\mu\text{mol L}^{-1}$ ); lane 6: DNA + **3** (12.50  $\mu\text{mol L}^{-1}$ ); lane 7: DNA control; lane 8: DNA + **4** (6.25  $\mu\text{mol L}^{-1}$ ); lane 9: DNA + **4** (12.50  $\mu\text{mol L}^{-1}$ ); lane 10: DNA control; lane 11: DNA + **1** (6.25  $\mu\text{mol L}^{-1}$ ); lane 12: DNA + **1** (12.50  $\mu\text{mol L}^{-1}$ ); lane 13: DNA control; lane 14: DNA + **5** (6.25  $\mu\text{mol L}^{-1}$ ); lane 15: DNA + **5** (12.50  $\mu\text{mol L}^{-1}$ ).

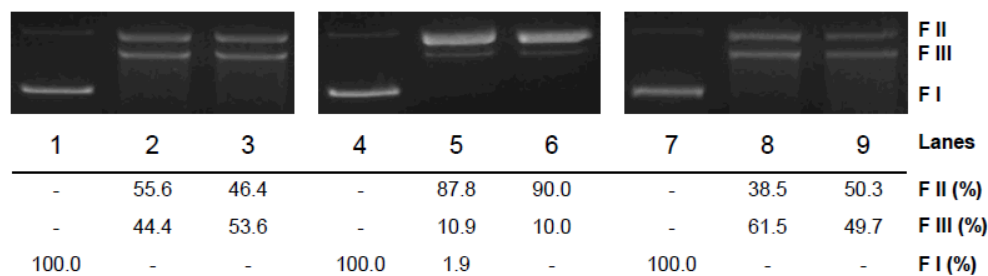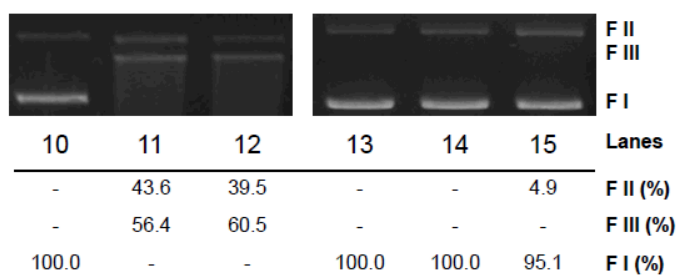

Figure S4. DNA cleavage of complexes **1-5** in dark at 500  $\mu\text{mol L}^{-1}$  of MPA for 15 min at 37°C. Lane 1: DNA control; lane 2: DNA + **2** (6.25  $\mu\text{mol L}^{-1}$ ); lane 3: DNA + **2** (12.50  $\mu\text{mol L}^{-1}$ ); lane 4: DNA control; lane 5: DNA + **3** (6.25  $\mu\text{mol L}^{-1}$ ); lane 6: DNA + **3** (12.50  $\mu\text{mol L}^{-1}$ ); lane 7: DNA control; lane 8: DNA + **4** (6.25  $\mu\text{mol L}^{-1}$ ); lane 9: DNA + **4** (12.50  $\mu\text{mol L}^{-1}$ ); lane 10: DNA control; lane 11: DNA + **1** (6.25  $\mu\text{mol L}^{-1}$ ); lane 12: DNA + **1** (12.50  $\mu\text{mol L}^{-1}$ ); lane 13: DNA control; lane 14: DNA + **5** (6.25  $\mu\text{mol L}^{-1}$ ); lane 15: DNA + **5** (12.50  $\mu\text{mol L}^{-1}$ ).

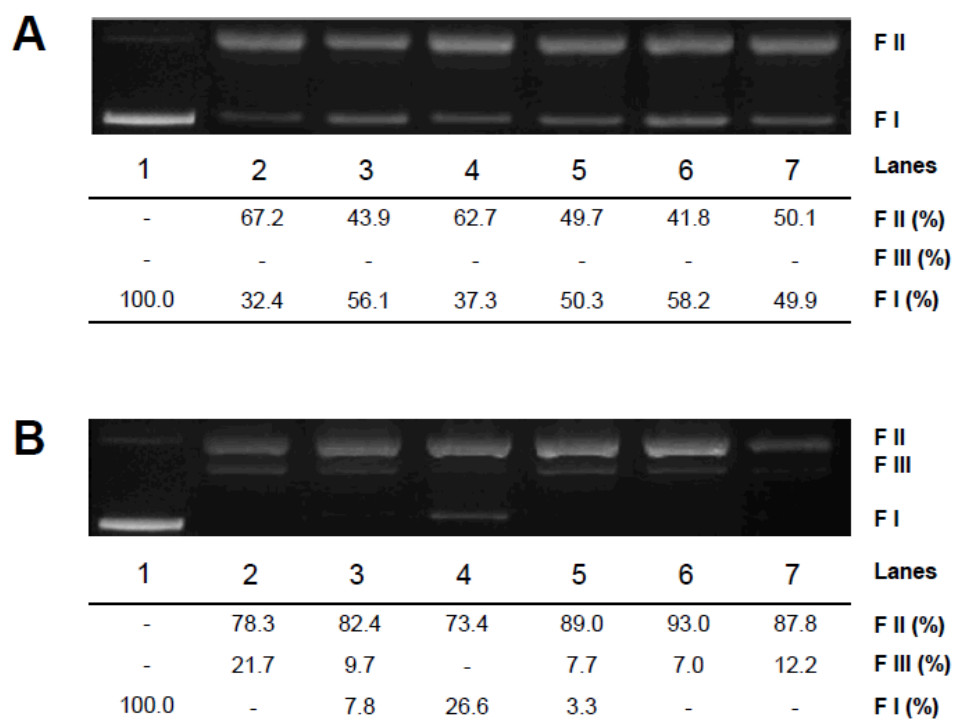

Figure S5. Photocleavage of PBSK-II ( $25 \mu\text{mol L}^{-1}$  bp) of **3** in a Tris-HCl buffer (pH 7.2, NaCl  $50 \mu\text{mol L}^{-1}$ ) in  $\text{CH}_3\text{CN}/\text{H}_2\text{O}$  25/75 at: (A)  $37^\circ\text{C}$  ( $365 \text{ nm}$ ,  $12.5 \mu\text{mol L}^{-1}$ , 15 min) and (B)  $50^\circ\text{C}$  ( $635 \text{ nm}$ ,  $50 \mu\text{mol L}^{-1}$ , 20 min). (A) Lane 1: DNA control; lane 2: DNA + **3**; lane 3: DNA + **3** + DMSO; lane 4: DNA + **3** + KI; lane 5: DNA + **3** + SOD; lane 6: DNA + **3** +  $\text{NaN}_3$ ; lane 7: DNA + **3** +  $\text{D}_2\text{O}$ ; (B) Lane 1: DNA control; lane 2: DNA + **3**; lane 3: DNA + **3** + DMSO; lane 4: DNA + **3** + KI; lane 5: DNA + **3** + SOD; lane 6: DNA + **3** +  $\text{NaN}_3$ ; lane 7: DNA + **3** +  $\text{D}_2\text{O}$ .

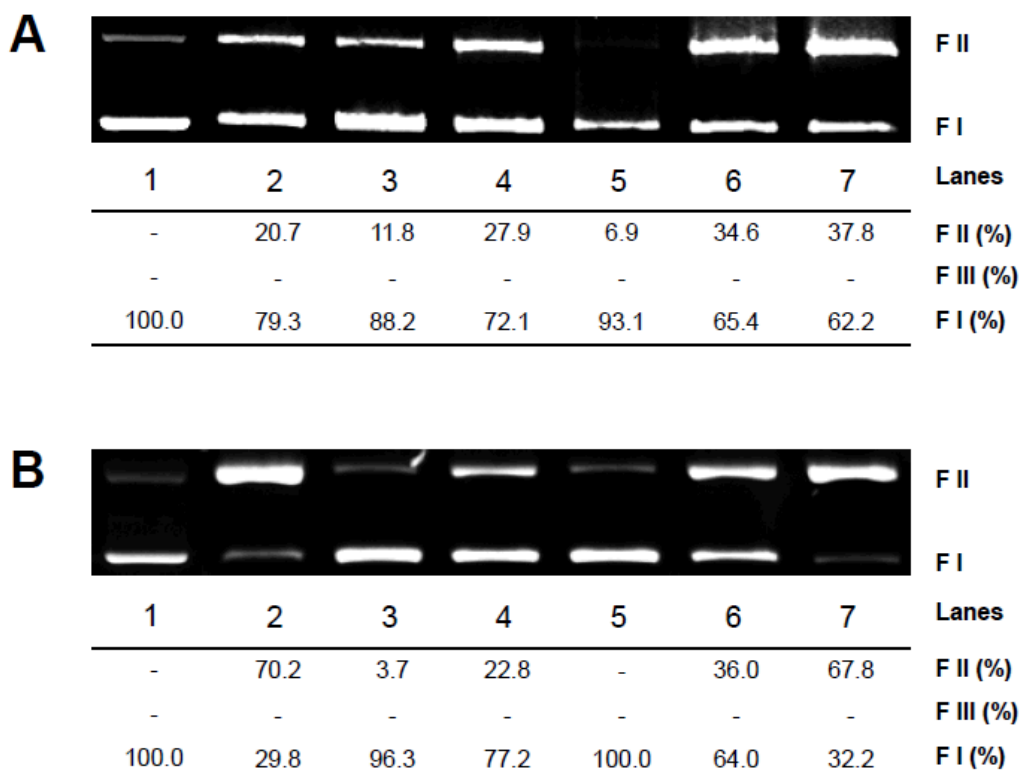

Figure S6. Photocleavage of PBSK-II ( $25 \mu\text{mol L}^{-1}$  bp) of **4** in a Tris-HCl buffer (pH 7.2, NaCl  $50 \mu\text{mol L}^{-1}$ ) in  $\text{CH}_3\text{CN}/\text{H}_2\text{O}$  25/75 at: (A)  $37^\circ\text{C}$  (365 nm,  $12.5 \mu\text{mol L}^{-1}$ , 15 min) and (B)  $50^\circ\text{C}$  (635 nm,  $50 \mu\text{mol L}^{-1}$ , 20 min). (A) Lane 1: DNA control; lane 2: DNA + **4**; lane 3: DNA + **4** + DMSO; lane 4: DNA + **4** + KI; lane 5: DNA + **4** + SOD; lane 6: DNA + **4** +  $\text{NaN}_3$ ; lane 7: DNA + **4** +  $\text{D}_2\text{O}$ ; (B) Lane 1: DNA control; lane 2: DNA + **4**; lane 3: DNA + **4** + DMSO; lane 4: DNA + **4** + KI; lane 5: DNA + **4** + SOD; lane 6: DNA + **4** +  $\text{NaN}_3$ ; lane 7: DNA + **4** +  $\text{D}_2\text{O}$ .

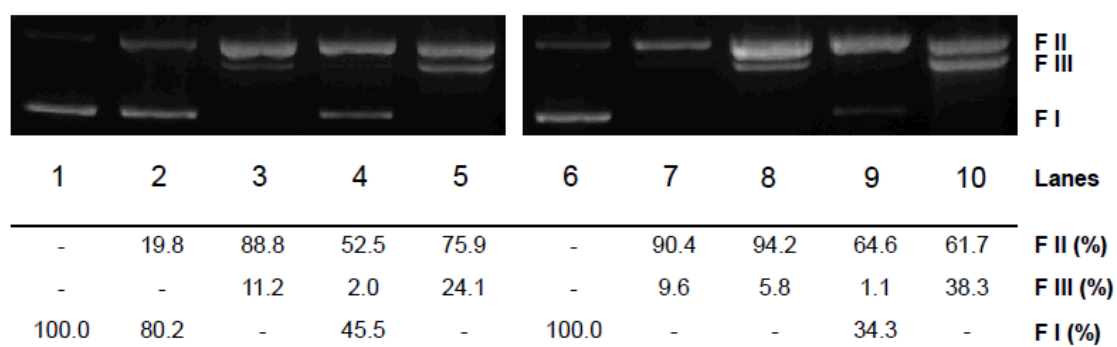

Figure S7. DNA photocleavage under UV irradiation in Oxygen (lanes 1-5) and Argon (6-7) atmosphere. Lane 1: DNA control; lane 2: DNA + Fe(EDTA); lane 3: DNA + **2**; lane 4: DNA + **3**; lane 5: DNA + **4**; lane 6: DNA control; lane 7: DNA + Fe(EDTA); lane 8: DNA + **2**; lane 9: DNA + **3**; lane 10: DNA + **4**.

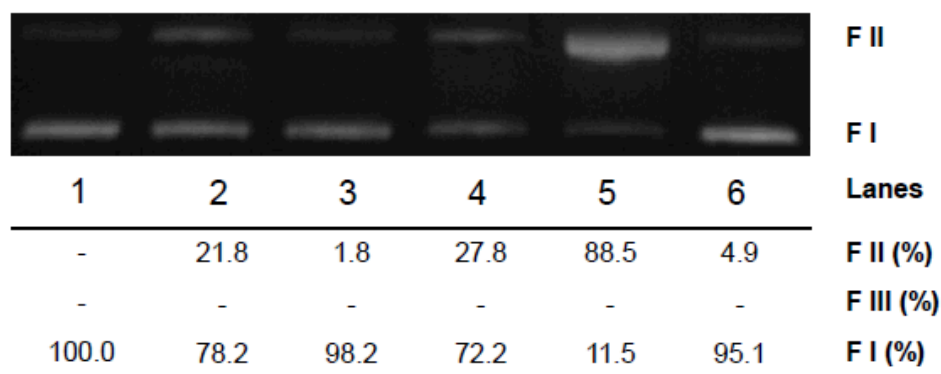

Figure S8. DNA photocleavage under UV light (365 nm). [complex] = 5  $\mu\text{molL}^{-1}$  and 10 minutes of irradiation for **1-5**.

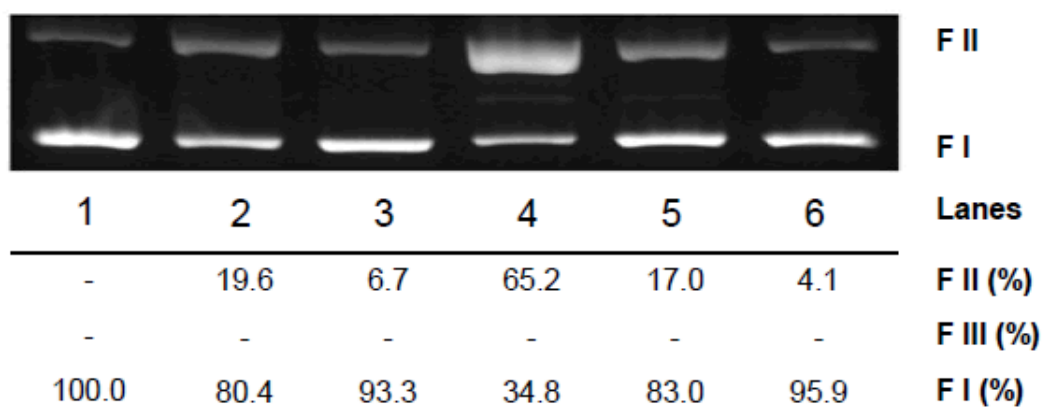

Figure S9. DNA photocleavage under red light (635 nm). [complex] = 50  $\mu\text{molL}^{-1}$  and 20 minutes of irradiation for **1-5**.

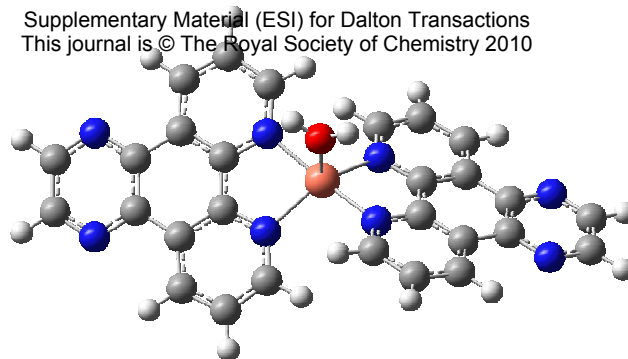

Figure S10. Calculated structure for the optimized complex  $\text{Cu}(\text{dpq})_2(\text{H}_2\text{O})^{2+}$  **1**.

Table S1. Cartesian coordinates the optimized complex  $\text{Cu}(\text{dpq})_2(\text{H}_2\text{O})^{2+}$  **1**.

|    | x           | y           | z           |
|----|-------------|-------------|-------------|
| Cu | 0.06133535  | 0.73249614  | -0.00936802 |
| C  | 4.05167154  | 1.44357331  | 2.60921162  |
| N  | -1.33506710 | -0.05178529 | 1.33116865  |
| C  | -2.55181017 | -0.23976333 | 0.73361165  |
| C  | -2.67624250 | 0.18992171  | -0.64257835 |
| N  | -1.55256107 | 0.69363654  | -1.23778951 |
| C  | -1.62705229 | 1.14235027  | -2.50361218 |
| C  | -2.81966223 | 1.08748518  | -3.24655375 |
| C  | -3.96334497 | 0.54707349  | -2.66535944 |
| C  | -3.90895296 | 0.07927816  | -1.33210688 |
| C  | -5.06358279 | -0.48247947 | -0.62983258 |
| N  | -6.23929875 | -0.57734243 | -1.29989587 |
| C  | -7.25608955 | -1.12647231 | -0.63659600 |
| C  | -7.12327241 | -1.59306059 | 0.69724712  |
| N  | -5.97419047 | -1.50998982 | 1.36677540  |
| C  | -4.92763663 | -0.95716046 | 0.70360042  |
| C  | -3.65604381 | -0.80877334 | 1.41346101  |
| C  | -3.46143570 | -1.22651062 | 2.75048818  |
| C  | -2.21239483 | -1.05892654 | 3.33823900  |
| C  | -1.17317273 | -0.46494571 | 2.59886303  |
| C  | 4.06371667  | 0.75170528  | 1.37599367  |
| C  | 5.28060738  | 0.20665271  | 0.77256015  |
| N  | 6.45140252  | 0.35175893  | 1.44210908  |
| C  | 7.52926937  | -0.18746263 | 0.87385579  |
| C  | 7.46394720  | -0.88091502 | -0.36295580 |
| N  | 6.32086507  | -1.03477753 | -1.03041659 |
| C  | 5.21300975  | -0.49565122 | -0.46265385 |
| C  | 3.94123330  | -0.60732191 | -1.17964986 |
| C  | 3.80944224  | -1.26175859 | -2.42655868 |
| C  | 2.55641243  | -1.33322027 | -3.02587414 |
| C  | 1.44968848  | -0.74163080 | -2.38988881 |
| N  | 1.55042213  | -0.10630271 | -1.21045539 |
| C  | 2.77366456  | -0.05637378 | -0.59798670 |
| C  | 2.83464324  | 0.60980481  | 0.68550415  |
| C  | 1.66755446  | 1.75006748  | 2.36181649  |
| C  | 2.85012644  | 1.95101513  | 3.09563240  |
| O  | -0.09080470 | 3.15469917  | -0.18243968 |
| H  | 4.98761675  | 1.57063723  | 3.15550934  |
| H  | -0.71449565 | 1.56338380  | -2.92991102 |
| H  | -2.83050455 | 1.46629777  | -4.26933325 |

|   |             |             |             |
|---|-------------|-------------|-------------|
| H | -4.90403479 | 0.47826881  | -3.21435649 |
| H | -8.21099096 | -1.20536946 | -1.16440268 |
| H | -7.97337926 | -2.04047943 | 1.22006101  |
| H | -4.29423051 | -1.67423109 | 3.29503433  |
| H | -2.02416383 | -1.37653396 | 4.36467670  |
| H | -0.18595606 | -0.32338075 | 3.04162245  |
| H | 8.48042737  | -0.07415678 | 1.40185668  |
| H | 8.36347285  | -1.31466891 | -0.80855902 |
| H | 4.69244803  | -1.69977818 | -2.89383172 |
| H | 2.41659216  | -1.83609530 | -3.98364368 |
| H | 0.45826168  | -0.78589701 | -2.84328629 |
| H | 0.71037018  | 2.13938212  | 2.71364792  |
| H | 2.80810606  | 2.49924065  | 4.03787059  |
| H | -0.88772870 | 3.68102627  | -0.37792940 |
| H | 0.64679853  | 3.79070196  | -0.13980651 |
| N | 1.65697991  | 1.08516473  | 1.19242208  |

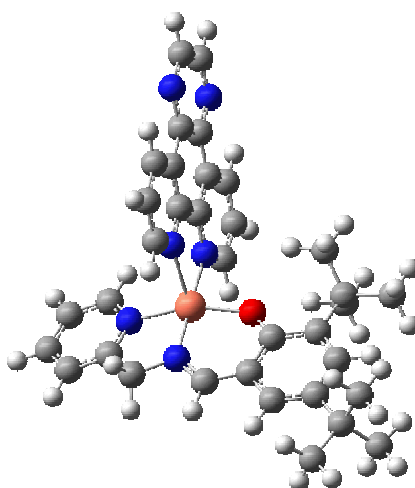

Figure S11. Calculated structure for the optimized complex  $\text{Cu}(\text{L}_1)(\text{dpq})^+ \mathbf{2}$ .

Table S2. Cartesian coordinates the optimized complex  $\text{Cu}(\text{L}_1)(\text{dpq})^+ \mathbf{2}$ .

|    | x           | y           | z           |
|----|-------------|-------------|-------------|
| Cu | 0.02887509  | 0.09123915  | 0.01133551  |
| O  | 1.99806005  | 0.06433155  | 0.03472779  |
| N  | -0.45376790 | 2.38348259  | -0.14534224 |
| C  | -0.43515991 | 2.79495812  | -1.44055065 |
| C  | -0.12671784 | 1.79099140  | -2.46107480 |
| N  | 0.10539729  | 0.51001468  | -2.05165565 |
| C  | 0.42883942  | -0.41731765 | -2.96643007 |
| H  | 0.62771587  | -1.42247290 | -2.58716609 |
| C  | 0.51668073  | -0.13401626 | -4.34036683 |
| H  | 0.78416236  | -0.92701429 | -5.04056676 |
| C  | 0.26164375  | 1.16061112  | -4.77715238 |
| H  | 0.31462868  | 1.42980782  | -5.83306631 |
| C  | -0.06716106 | 2.15840393  | -3.83215611 |
| C  | -0.32207209 | 3.54664805  | -4.22059867 |
| N  | -0.27501977 | 3.86875348  | -5.53850932 |

|   |             |             |             |
|---|-------------|-------------|-------------|
| C | -0.53377897 | 5.13876883  | -5.85046301 |
| H | -0.49496541 | 5.40890005  | -6.91034154 |
| C | -0.84454731 | 6.10707641  | -4.86703525 |
| H | -1.05249598 | 7.14389657  | -5.14845912 |
| N | -0.90041573 | 5.80839660  | -3.56912327 |
| C | -0.64529091 | 4.51787881  | -3.23186273 |
| C | -0.66843342 | 4.14432095  | -1.81838003 |
| C | -0.92919344 | 5.08048313  | -0.79135494 |
| H | -1.11334766 | 6.12208440  | -1.05792110 |
| C | -0.93710464 | 4.65233957  | 0.53044780  |
| H | -1.12523509 | 5.34950520  | 1.34898393  |
| C | -0.69444671 | 3.29227202  | 0.80569141  |
| H | -0.68823893 | 2.92521722  | 1.83654986  |
| N | -0.05971977 | -0.43675221 | 1.90210169  |
| C | 0.97743589  | -0.60138190 | 2.68994978  |
| H | 0.78085024  | -0.97133236 | 3.71023950  |
| C | 2.35084559  | -0.35434820 | 2.38960253  |
| C | 2.81066410  | -0.00840386 | 1.06036114  |
| C | 4.23135685  | 0.22858870  | 0.87921794  |
| C | 5.05454074  | 0.09509527  | 1.99627513  |
| H | 6.12006347  | 0.27269192  | 1.85574153  |
| C | 4.62645646  | -0.25300546 | 3.31087631  |
| C | 3.27121606  | -0.47704800 | 3.47288286  |
| H | 2.86364162  | -0.74190333 | 4.45053360  |
| C | -1.38857962 | -0.79411196 | 2.40705426  |
| H | -1.79175554 | 0.03258991  | 3.02531480  |
| H | -1.35170867 | -1.68351603 | 3.06133431  |
| C | -2.35381427 | -1.04358093 | 1.26513950  |
| N | -1.94033157 | -0.67882381 | 0.02700868  |
| C | -2.78405284 | -0.85077361 | -1.01821799 |
| H | -2.40906725 | -0.53994654 | -1.99394517 |
| C | -4.06079773 | -1.39224365 | -0.87716950 |
| H | -4.70138266 | -1.51296221 | -1.75229743 |
| C | -4.48837665 | -1.77655069 | 0.40115922  |
| H | -5.47879431 | -2.21129678 | 0.55052796  |
| C | -3.62407727 | -1.59747605 | 1.48323673  |
| H | -3.92504736 | -1.88676825 | 2.49262858  |
| C | 4.81711214  | 0.59218215  | -0.51098308 |
| C | 6.34953113  | 0.80707680  | -0.46594956 |
| H | 6.70471702  | 1.06644932  | -1.47434338 |
| H | 6.89302898  | -0.09901594 | -0.15697673 |
| H | 6.63860373  | 1.63349979  | 0.20148530  |
| C | 4.54846790  | -0.56085380 | -1.51765019 |
| H | 4.97249869  | -0.30761232 | -2.50248609 |
| H | 3.47532713  | -0.74848100 | -1.64276356 |
| H | 5.02402679  | -1.49451615 | -1.17996155 |
| C | 4.18531419  | 1.91495858  | -1.02830834 |
| H | 4.60723409  | 2.17067079  | -2.01345487 |
| H | 4.40739665  | 2.74767137  | -0.34279996 |
| H | 3.09668758  | 1.83211059  | -1.13054856 |
| C | 5.65683706  | -0.35667922 | 4.45803627  |
| C | 4.99648841  | -0.74577638 | 5.80042719  |
| H | 5.76433465  | -0.80511408 | 6.58634748  |
| H | 4.50549289  | -1.73005982 | 5.75081100  |
| H | 4.25332670  | -0.00115308 | 6.12732432  |



|   |            |             |            |
|---|------------|-------------|------------|
| C | 6.36348554 | 1.01336596  | 4.64810086 |
| H | 7.10446016 | 0.94975198  | 5.46074090 |
| H | 5.63904718 | 1.80002287  | 4.90884978 |
| H | 6.89730738 | 1.33600745  | 3.74207162 |
| C | 6.71383316 | -1.44029347 | 4.10860942 |
| H | 7.45437650 | -1.52742621 | 4.91954498 |
| H | 7.26448389 | -1.20291778 | 3.18664189 |
| H | 6.24203301 | -2.42555801 | 3.97418676 |

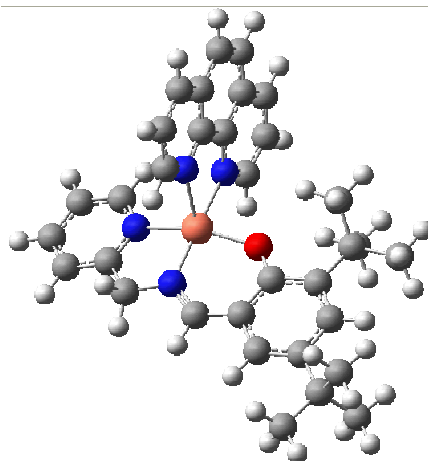

Figure S12. Calculated structure for the optimized complex  $\text{Cu}(\text{L}_1)(\text{phen})^+ \mathbf{3}$ .

Table S3. Cartesian coordinates the optimized complex  $\text{Cu}(\text{L}_1)(\text{phen})^+ \mathbf{3}$ .

|    | x           | y           | z           |
|----|-------------|-------------|-------------|
| Cu | -0.00803450 | 0.05239331  | 0.01009406  |
| O  | 1.96097531  | 0.06340178  | 0.02148407  |
| N  | -0.49425949 | 2.35209550  | -0.18647465 |
| C  | -0.45043832 | 2.72731922  | -1.49471829 |
| C  | -0.15530082 | 1.70828470  | -2.48616521 |
| N  | 0.05774012  | 0.42585327  | -2.06350552 |
| C  | 0.37045847  | -0.51188109 | -2.96710477 |
| H  | 0.55208322  | -1.51773274 | -2.58086571 |
| C  | 0.47157313  | -0.24264682 | -4.34698843 |
| H  | 0.72931314  | -1.04835252 | -5.03616718 |
| C  | 0.24194936  | 1.04931827  | -4.79695472 |
| H  | 0.31161343  | 1.29033522  | -5.86097406 |
| C  | -0.07606923 | 2.07132940  | -3.86638065 |
| C  | -0.31168117 | 3.43648446  | -4.25454010 |
| C  | -0.59468410 | 4.39785083  | -3.32082643 |
| C  | -0.66390366 | 4.07431344  | -1.92118329 |
| C  | -0.92778742 | 5.03955021  | -0.91500303 |
| H  | -1.09624676 | 6.08229239  | -1.19632741 |
| C  | -0.96187331 | 4.64831941  | 0.41491624  |
| H  | -1.15438112 | 5.36790046  | 1.21276524  |
| C  | -0.73759265 | 3.28970657  | 0.73158490  |
| H  | -0.75219106 | 2.95519564  | 1.77348569  |
| N  | -0.07593006 | -0.46431388 | 1.90337225  |
| C  | 0.96869494  | -0.60813102 | 2.68575023  |
| H  | 0.78345062  | -0.97134400 | 3.71053689  |

|   |             |             |             |
|---|-------------|-------------|-------------|
| C | 2.33654298  | -0.34551517 | 2.37472630  |
| C | 2.78198270  | 0.00228975  | 1.04139754  |
| C | 4.19803773  | 0.25700710  | 0.84890297  |
| C | 5.03116645  | 0.13698811  | 1.96004501  |
| H | 6.09316963  | 0.32794702  | 1.81096943  |
| C | 4.61755358  | -0.21326478 | 3.27873620  |
| C | 3.26668524  | -0.45364090 | 3.45160200  |
| H | 2.86967848  | -0.72119292 | 4.43287125  |
| C | -1.39682315 | -0.82912920 | 2.42378738  |
| H | -1.79332296 | -0.00931352 | 3.05527523  |
| H | -1.34820287 | -1.72445689 | 3.06928520  |
| C | -2.37762407 | -1.07122673 | 1.29385425  |
| N | -1.97806350 | -0.70604681 | 0.05130903  |
| C | -2.83624294 | -0.86961338 | -0.98345793 |
| H | -2.47215100 | -0.55722311 | -1.96275123 |
| C | -4.11412874 | -1.40407764 | -0.82720564 |
| H | -4.76694032 | -1.51788990 | -1.69421547 |
| C | -4.52713465 | -1.79005053 | 0.45543217  |
| H | -5.51796931 | -2.21970171 | 0.61643805  |
| C | -3.64802201 | -1.61885216 | 1.52671341  |
| H | -3.93755552 | -1.90899899 | 2.53921787  |
| C | 4.76826114  | 0.62630350  | -0.54631148 |
| C | 6.29815173  | 0.86095657  | -0.51346068 |
| H | 6.64227305  | 1.12303213  | -1.52499358 |
| H | 6.85561403  | -0.03748903 | -0.20697181 |
| H | 6.58158647  | 1.69228080  | 0.15027681  |
| C | 4.50658670  | -0.53101191 | -1.54981940 |
| H | 4.91997203  | -0.27332481 | -2.53809549 |
| H | 3.43500647  | -0.73225907 | -1.66657178 |
| H | 4.99657149  | -1.45824316 | -1.21502113 |
| C | 4.11550725  | 1.94027654  | -1.05988805 |
| H | 4.52646101  | 2.20049680  | -2.04852927 |
| H | 4.33231328  | 2.77647131  | -0.37692025 |
| H | 3.02737489  | 1.84365301  | -1.15362069 |
| C | 5.65822615  | -0.30128125 | 4.41798655  |
| C | 5.01341679  | -0.69599667 | 5.76623546  |
| H | 5.78800687  | -0.74368930 | 6.54633533  |
| H | 4.53478602  | -1.68660802 | 5.72231216  |
| H | 4.26321543  | 0.03969041  | 6.09723953  |
| C | 6.34856062  | 1.07816478  | 4.59982032  |
| H | 7.09623040  | 1.02606992  | 5.40722150  |
| H | 5.61600204  | 1.85610561  | 4.86399883  |
| H | 6.87157613  | 1.40537412  | 3.68918036  |
| C | 6.72656093  | -1.37168299 | 4.06256412  |
| H | 7.47451646  | -1.44755378 | 4.86786765  |
| H | 7.26698266  | -1.12881392 | 3.13594936  |
| H | 6.26673765  | -2.36327279 | 3.93350361  |
| H | -0.76540568 | 5.43237330  | -3.62882134 |
| H | -0.25295572 | 3.69535480  | -5.31465411 |

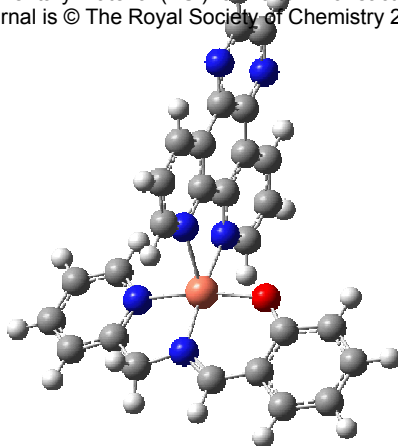

Figure S13. Calculated structure for the optimized complex  $\text{Cu}(\text{L}_2)(\text{dpq})^+ \mathbf{4}$ .

Table S4. Cartesian coordinates the optimized complex  $\text{Cu}(\text{L}_2)(\text{dpq})^+ \mathbf{4}$ .

|    | x           | y           | z           |
|----|-------------|-------------|-------------|
| Cu | 4.75955036  | 11.43180182 | 7.65873047  |
| O  | 4.66923144  | 9.49250056  | 7.39779634  |
| N  | 5.62986648  | 11.36721098 | 9.83658854  |
| C  | 6.95668741  | 11.07108392 | 9.80916763  |
| C  | 7.60196351  | 10.98140689 | 8.49768173  |
| N  | 6.84289049  | 11.22203596 | 7.39021164  |
| C  | 7.40752632  | 11.12150393 | 6.17746069  |
| H  | 6.75358178  | 11.30114267 | 5.32062059  |
| C  | 8.76267147  | 10.79885503 | 5.99352344  |
| H  | 9.17047186  | 10.73024985 | 4.98361459  |
| C  | 9.55554673  | 10.56659967 | 7.11077430  |
| H  | 10.61198879 | 10.31106103 | 7.01989764  |
| C  | 8.98120580  | 10.65617985 | 8.39867478  |
| C  | 9.75394799  | 10.40159056 | 9.61485480  |
| N  | 11.07026581 | 10.09221502 | 9.49250585  |
| C  | 11.74140015 | 9.88808278  | 10.62596859 |
| H  | 12.80208514 | 9.63358186  | 10.53763780 |
| C  | 11.12403181 | 9.99096700  | 11.89515101 |
| H  | 11.69654073 | 9.81781862  | 12.81168600 |
| N  | 9.83489200  | 10.29952391 | 12.03473368 |
| C  | 9.13526993  | 10.51504299 | 10.89088107 |
| C  | 7.70921345  | 10.82466089 | 10.98844866 |
| C  | 7.03579730  | 10.90295372 | 12.22931480 |
| H  | 7.59405283  | 10.71921809 | 13.14823797 |
| C  | 5.68034046  | 11.20571296 | 12.24729201 |
| H  | 5.12765452  | 11.26792410 | 13.18654988 |
| C  | 5.01787352  | 11.42871884 | 11.02429459 |
| H  | 3.94880953  | 11.66055192 | 11.00600782 |
| N  | 2.80286244  | 11.62629775 | 7.56056544  |
| C  | 1.94581015  | 10.64929684 | 7.37794955  |
| H  | 0.87909729  | 10.91677477 | 7.29427869  |
| C  | 2.24184037  | 9.25795756  | 7.26874959  |
| C  | 3.59725804  | 8.74752641  | 7.28530649  |
| C  | 3.76710753  | 7.33427655  | 7.15618247  |
| C  | 2.67849997  | 6.48763158  | 7.01514245  |
| H  | 2.85051538  | 5.41181847  | 6.91773468  |
| C  | 1.35250931  | 6.98740245  | 6.99476066  |
| C  | 1.14978098  | 8.34882946  | 7.11806372  |

|   |            |             |            |
|---|------------|-------------|------------|
| H | 0.13281502 | 8.75294148  | 7.10466866 |
| C | 2.29545607 | 13.00054407 | 7.63556944 |
| H | 1.85351211 | 13.18673879 | 8.63396762 |
| H | 1.49048434 | 13.17565888 | 6.90010831 |
| C | 3.41204018 | 14.00160032 | 7.41913541 |
| N | 4.67593453 | 13.51309986 | 7.43162135 |
| C | 5.71133226 | 14.37372728 | 7.28655640 |
| H | 6.70880862 | 13.93248501 | 7.30970473 |
| C | 5.53223116 | 15.74567804 | 7.11740860 |
| H | 6.39925369 | 16.39786201 | 7.00207759 |
| C | 4.22581213 | 16.25339133 | 7.09425445 |
| H | 4.04515842 | 17.32172029 | 6.95585872 |
| C | 3.15524422 | 15.37004316 | 7.24866043 |
| H | 2.12487791 | 15.73296297 | 7.23641157 |
| H | 0.50698620 | 6.30661645  | 6.88368477 |
| H | 4.78771634 | 6.94633036  | 7.16678137 |

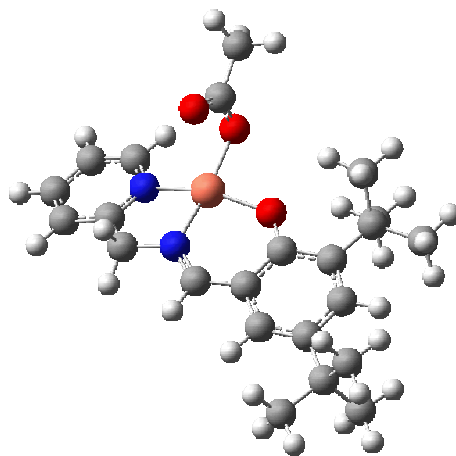

Figure S14. Calculated structure for the optimized complex Cu(L<sub>1</sub>)(OAc) **5**.

Table S5. Cartesian coordinates the optimized complex Cu(L<sub>1</sub>)(OAc) **5**.

|    | x           | y          | z           |
|----|-------------|------------|-------------|
| Cu | -0.63969856 | 1.09296216 | 1.69066786  |
| O  | 1.26885539  | 1.24748033 | 2.11180246  |
| O  | -0.31006135 | 0.80746257 | -0.25689703 |
| O  | -1.09078407 | 2.90127989 | -0.03513102 |
| N  | -1.15864946 | 1.52054002 | 3.53043300  |
| C  | -0.33465804 | 1.76535488 | 4.51907263  |
| C  | 1.09363845  | 1.80306776 | 4.46284702  |
| C  | -0.39233466 | 2.16392007 | -2.24169696 |
| C  | 1.83868509  | 1.53819073 | 3.24680088  |
| C  | 3.29113376  | 1.59922974 | 3.32371573  |
| C  | 3.86597001  | 1.90706643 | 4.55324743  |
| C  | 3.15063773  | 2.16936319 | 5.76038434  |
| C  | 1.77178386  | 2.10695732 | 5.68175390  |
| C  | -2.60148827 | 1.53316461 | 3.76791664  |
| C  | -0.63419406 | 1.97639289 | -0.74657120 |
| C  | -3.30851829 | 0.67152963 | 2.73548654  |
| N  | -2.58078580 | 0.34925857 | 1.64177030  |

|   |             |             |             |
|---|-------------|-------------|-------------|
| C | -3.14138030 | -0.38562310 | 0.65732863  |
| C | -4.46120551 | -0.83467868 | 0.72676515  |
| C | -5.22353138 | -0.50540184 | 1.85575159  |
| C | -4.64091146 | 0.25833322  | 2.87229261  |
| H | -0.77344653 | 1.96189184  | 5.51328132  |
| H | 4.95419339  | 1.95461830  | 4.60227411  |
| H | 1.15294969  | 2.29557091  | 6.56217678  |
| H | -2.98524814 | 2.56806861  | 3.66704540  |
| H | -2.85961935 | 1.19473353  | 4.78786557  |
| H | -2.49197980 | -0.59796447 | -0.19438003 |
| H | -4.87806965 | -1.43078204 | -0.08730313 |
| H | -6.25897674 | -0.84223639 | 1.94470734  |
| H | -5.20960767 | 0.53095634  | 3.76484847  |
| H | 0.67006540  | 2.40737653  | -2.40211228 |
| H | -1.00004604 | 2.99287676  | -2.62554150 |
| H | -0.60571321 | 1.24231768  | -2.80152680 |
| C | 4.16059738  | 1.32752315  | 2.06887031  |
| C | 3.90429673  | -0.11285710 | 1.54150391  |
| C | 3.83179945  | 2.36378556  | 0.95786903  |
| C | 5.67463011  | 1.44123858  | 2.36890641  |
| H | 4.14878138  | -0.86097403 | 2.31267233  |
| H | 2.86055546  | -0.25315469 | 1.23859121  |
| H | 4.54464618  | -0.30945015 | 0.66625903  |
| H | 4.03222533  | 3.38926016  | 1.30768906  |
| H | 4.46583158  | 2.18063890  | 0.07497119  |
| H | 2.78370676  | 2.30368531  | 0.64558936  |
| H | 6.23884207  | 1.23757678  | 1.44606785  |
| H | 5.96185482  | 2.44861849  | 2.70808415  |
| H | 6.00985914  | 0.71079141  | 3.12239025  |
| C | 3.92199136  | 2.50247868  | 7.05802644  |
| C | 4.86414753  | 1.32273886  | 7.42396521  |
| C | 4.76615819  | 3.78919750  | 6.84922951  |
| C | 2.97448627  | 2.74192768  | 8.25551699  |
| H | 4.29035270  | 0.39779471  | 7.58954213  |
| H | 5.60065801  | 1.12026242  | 6.63263038  |
| H | 5.42335188  | 1.54710208  | 8.34688896  |
| H | 4.12190553  | 4.64628473  | 6.59969386  |
| H | 5.32551124  | 4.03855165  | 7.76582165  |
| H | 5.49886071  | 3.67444965  | 6.03666408  |
| H | 3.56445381  | 2.97150329  | 9.15632113  |
| H | 2.29666789  | 3.59183662  | 8.08186959  |
| H | 2.36422636  | 1.85329409  | 8.48235252  |
